# Supplementary material
Source: PubMed Central journal article supplement (PMC5508215)

## Supplemental Material

**Supplemental Table.** Demographics, descriptive statistics and imaging outcomes in subset of women diagnosed with breast cancer.

|                                                                                                                                                                                                                                                                                                                                                                                                   | Pre-Treatment<br>(n=13) | Non-<br>Anthracycline<br>Treated<br>(n=17) | Anthracycline<br>Treated<br>(n=21) | ANOVA<br>p-value |
|---------------------------------------------------------------------------------------------------------------------------------------------------------------------------------------------------------------------------------------------------------------------------------------------------------------------------------------------------------------------------------------------------|-------------------------|--------------------------------------------|------------------------------------|------------------|
| <b>Age at exam, years</b>                                                                                                                                                                                                                                                                                                                                                                         | 54±12                   | 57±12                                      | 56±10                              | 0.76             |
| <b>Race</b>                                                                                                                                                                                                                                                                                                                                                                                       |                         |                                            |                                    | 0.22             |
| White                                                                                                                                                                                                                                                                                                                                                                                             | 8 (62%)                 | 15 (88%)                                   | 16 (76%)                           |                  |
| Black                                                                                                                                                                                                                                                                                                                                                                                             | 5 (38%)                 | 2 (12%)                                    | 5 (24%)                            |                  |
| <b>Female</b>                                                                                                                                                                                                                                                                                                                                                                                     | 13 (100%)               | 17 (100%)                                  | 21 (100%)                          |                  |
| <b>Breast Cancer</b>                                                                                                                                                                                                                                                                                                                                                                              | 13 (100%)               | 17 (100%)                                  | 21 (100%)                          |                  |
| <b>Time since Chemotherapy, years</b>                                                                                                                                                                                                                                                                                                                                                             | -                       | 2.6±0.9                                    | 3.3±1.9                            | 0.17*            |
| <b>Radiation Therapy</b>                                                                                                                                                                                                                                                                                                                                                                          | -                       | 13 (76%)                                   | 18 (86%)                           | 0.68*            |
| <b>CVD Risk Factors</b>                                                                                                                                                                                                                                                                                                                                                                           |                         |                                            |                                    |                  |
| Known CAD                                                                                                                                                                                                                                                                                                                                                                                         | -                       | 1 (6%)                                     | -                                  | 0.59             |
| Diabetes                                                                                                                                                                                                                                                                                                                                                                                          | 2 (15%)                 | 2 (12%)                                    | 3 (14%)                            | 0.96             |
| Hyperlipidemia                                                                                                                                                                                                                                                                                                                                                                                    | 3 (23%)                 | 4 (24%)                                    | 5 (24%)                            | 0.99             |
| Hypertension                                                                                                                                                                                                                                                                                                                                                                                      | 3 (23%)                 | 6 (35%)                                    | 7 (33%)                            | 0.75             |
| <b>Body mass index, kg/m<sup>2</sup></b>                                                                                                                                                                                                                                                                                                                                                          | 28.7±5.5                | 28.7±7.6                                   | 27.8±4.7                           | 0.87             |
| <b>Hematocrit, %</b>                                                                                                                                                                                                                                                                                                                                                                              | 36±3                    | 39±4                                       | 37±4                               | 0.19             |
| <b>Received gadolinium</b>                                                                                                                                                                                                                                                                                                                                                                        | 8 (62%)                 | 11 (65%)                                   | 12 (57%)                           | 0.89             |
| <b>CMR Results</b>                                                                                                                                                                                                                                                                                                                                                                                |                         |                                            |                                    |                  |
| LVEDV index, ml/m <sup>2</sup>                                                                                                                                                                                                                                                                                                                                                                    | 62±14                   | 57±13                                      | 58±15                              | 0.53             |
| LVESV index, ml/m <sup>2</sup>                                                                                                                                                                                                                                                                                                                                                                    | 26±8                    | 23±7                                       | 26±8                               | 0.28             |
| LV SV index, ml/m <sup>2</sup>                                                                                                                                                                                                                                                                                                                                                                    | 37±9                    | 34±8                                       | 31±10                              | 0.28             |
| LVEF, %                                                                                                                                                                                                                                                                                                                                                                                           | 59±7                    | 60±7                                       | 54±9                               | 0.03             |
| LV mass index, g/m <sup>2</sup>                                                                                                                                                                                                                                                                                                                                                                   | 50±6                    | 45±9                                       | 47±10                              | 0.38             |
| Native T1, ms                                                                                                                                                                                                                                                                                                                                                                                     | 1070±32                 | 1041±28                                    | 1037±27                            | <0.01            |
| ECV, %                                                                                                                                                                                                                                                                                                                                                                                            | 30.2±2.5                | 29.5±4.4                                   | 33.2±6.0                           | 0.17             |
| *p-value comparing survivors only. CVD = cardiovascular disease, CAD = coronary artery disease, CMR = cardiovascular magnetic resonance, LV = left ventricular, EDV = end diastolic volume, ESV = end systolic volume, EF = ejection fraction, ECV = extracellular volume fraction. Data presented as mean ± std or n (%). Cross-sectional data (participants in a unique group, no serial data). |                         |                                            |                                    |                  |

**Supplemental Figure.** Breast cancer survivors treated with anthracycline-based chemotherapy trended to have a higher extracellular volume than breast cancer survivors treated with non-anthracycline based chemotherapy or newly diagnosed breast cancer patients prior to receipt of cancer treatment therapies.

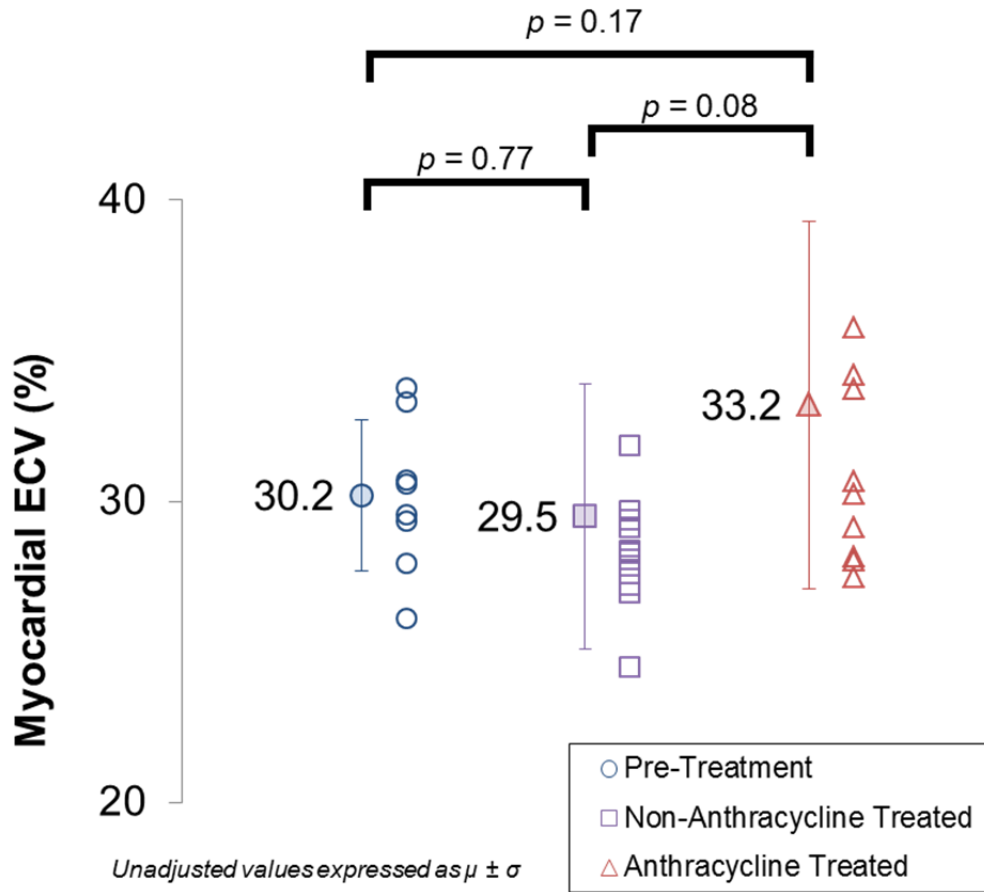

Supplement: NIHMS803197-supplement-Supplemental_Material.pdf [file NIHMS803197-supplement-Supplemental_Material.pdf]
